# Supplementary material
Source: Royal Society of Chemistry journal article supplement (doi:10.1039/d6ma00643d)
Supplement: d6ma00643d1.pdf [file d6ma00643d1.pdf]

1 **Supplementary data**

2

3 **Recapitulating native aculeate silk structure enables enhanced**  
4 **mechanical performance in recombinant protein materials**

5

6

7

8 Lyndall J. Briggs<sup>1</sup>, Michelle Michie<sup>1</sup>, Jian-Wei Liu<sup>2</sup>, Denise Thomas<sup>3</sup>, David Cantor<sup>3</sup>, Jacinta  
9 Poole<sup>4</sup>, Tara D. Sutherland<sup>1</sup>, Caitlin L. Johnston<sup>1</sup>

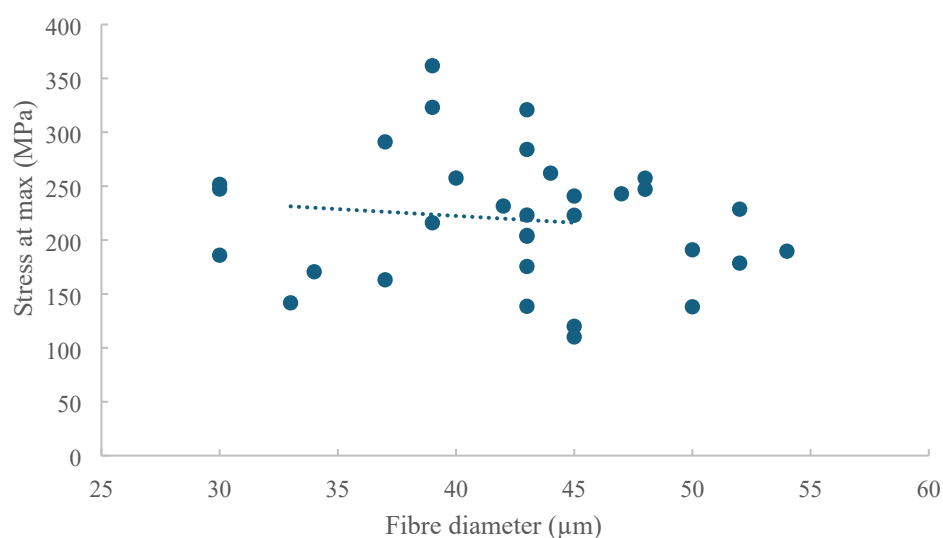

10

11 **Supplementary Figure 1. Relationship between fibre diameter and stress at mx for the 33**  
12 **recombinant silk fibres in this study, showing trend line and R<sup>2</sup> value.**

13

14

15 **Supplementary Table 1. The protein and amino acids identified as contributing to**  
16 **spontaneous or thermally induced isopeptide cross-links between two proteins in F1-F4 silk**  
17 **materials. ‘Same’ indicates the same lysine as in the row above. For simplicity, peptides with**  
18 **more than one cross-link were excluded from the analysis.**

19

| Protein hosting lysine (K) side of cross-link | Spontaneous cross-links (Controls) |           | ~115 °C induced cross-links (SDS PAGE gel band) |           | ~190 °C induced cross-links (Silk films) |           |
|-----------------------------------------------|------------------------------------|-----------|-------------------------------------------------|-----------|------------------------------------------|-----------|
|                                               |                                    |           |                                                 |           |                                          |           |
| <b>F1</b>                                     | F1:247[K]                          | F4:145[E] | F1:41[K]                                        | F4:201[E] | F1:41[K]                                 | F3:179[E] |
|                                               |                                    |           | F1:66[K]                                        | F3:129[T] | F1:83[K]                                 | F2:113[T] |
|                                               |                                    |           | same                                            | F3:132[T] | same                                     | F4:148[E] |
|                                               |                                    |           | F1:118[K]                                       | F4:126[T] | same                                     | F4:149[S] |
|                                               |                                    |           | same                                            | F4:132[E] | F1:139[K]                                | F2:111[E] |
|                                               |                                    |           | same                                            | F4:242[E] | same                                     | F2:113[T] |
|                                               |                                    |           | same                                            | F4:245[S] | same                                     | F3:308[S] |
|                                               |                                    |           | same                                            | F4:249[E] | same                                     | F3:309[E] |
|                                               |                                    |           | F1:149[K]                                       | F2:131[T] | F1:149[K]                                | F2:90[E]  |
|                                               |                                    |           | F1:151[K]                                       | F3:116[S] | F1:174[K]                                | F4:317[T] |
|                                               |                                    |           | same                                            | F3:119[E] | same                                     | F4:319[E] |
|                                               |                                    |           | F1:247[K]                                       | F4:145[E] | F1:187[K]                                | F2:111[E] |
|                                               |                                    |           | same                                            | F4:149[S] | same                                     | F2:113[T] |
|                                               |                                    |           | F1:295[K]                                       | F3:181[T] | same                                     | F3:308[S] |
|                                               |                                    |           |                                                 |           | same                                     | F3:309[E] |
|                                               | <b>F2</b>                          |           |                                                 |           |                                          | F2:118[K] |
|                                               |                                    |           |                                                 |           | F2:156[K]                                | F4:126[T] |
|                                               |                                    |           |                                                 |           | F2:178[K]                                | F4:319[E] |
|                                               |                                    |           |                                                 |           | F2:178[K]                                | F4:316[T] |
|                                               |                                    |           |                                                 |           | F2:288[K]                                | F1:177[E] |
| <b>F3</b>                                     |                                    |           | F3:163[K]                                       | F4:126[T] | F3:52[K]                                 | F1:177[E] |
|                                               |                                    |           | same                                            | F4:131[E] | same                                     | F4:145[E] |
|                                               |                                    |           | F3:307[K]                                       | F4:170[E] | same                                     | F4:175[E] |
|                                               |                                    |           | same                                            | F4:176[S] | F3:163[K]                                | F4:126[T] |
|                                               |                                    |           |                                                 |           | same                                     | F4:127[E] |
| <b>F4</b>                                     | F4:30[K]                           | F2:195[S] | F4:30[K]                                        | F2:256[T] | F4:11[K]                                 | F2:113[T] |
|                                               |                                    |           | same                                            | F2:258[E] | same                                     | F2:134[S] |
|                                               |                                    |           | F4:146[K]                                       | F2:71[T]  | same                                     | F2:139[E] |
|                                               |                                    |           | same                                            | F2:75[E]  | F4:146[K]                                | F3:27[D]  |
|                                               |                                    |           | same                                            | F2:168[E] | same                                     | F3:116[S] |
|                                               |                                    |           | F4:152[K]                                       | F1:84[E]  | same                                     | F3:119[E] |
|                                               |                                    |           | same                                            | F1:85[T]  | same                                     | F2:90[E]  |
|                                               |                                    |           | F4:303[K]                                       | F3:233[E] | F4:152[K]                                | F2:134[S] |
|                                               |                                    |           | same                                            | F3:236[S] | same                                     | F2:139[E] |
|                                               |                                    |           |                                                 |           | same                                     | F3:303[E] |
|                                               |                                    |           |                                                 | F4:191[K] | F3:308[S]                                |           |

|  |  |  |  |  |           |           |
|--|--|--|--|--|-----------|-----------|
|  |  |  |  |  | same      | F3:309[E] |
|  |  |  |  |  | F4:307[K] | F2:113[T] |

1

2
